# Supplementary material for: Natural Xanthine Oxidase Inhibitor 5-O-Caffeoylshikimic Acid Ameliorates Kidney Injury Caused by Hyperuricemia in Mice
Source: MDPI journal article supplement (doi:10.3390/molecules26237307), 2021-12-01
Supplement: s1 [file s1]

## Supplementary Data

Article

# Natural Xanthine Oxidase Inhibitor 5-O-Caffeoylshikimic Acid Ameliorates Acute Kidney Injury Caused by Hyperuricemia in Mice

Dong Zhang<sup>1†</sup>, Mojiao Zhao<sup>2†</sup>, Yumei Li<sup>1</sup>, Dafang Zhang<sup>2</sup>, Yong Yang<sup>3\*</sup> and Lijing Li<sup>1\*</sup>

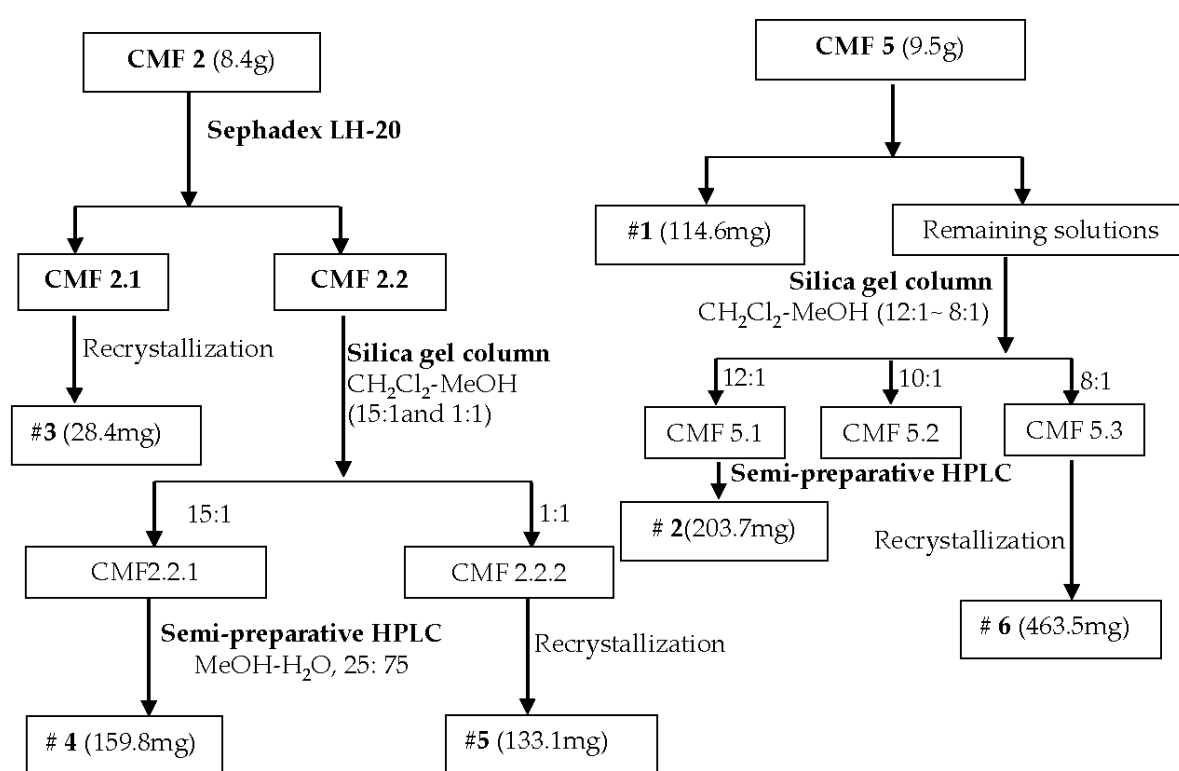

**Figure S1:** Detailed procedure of compounds isolated from CMF2 and CMF5.

**Figure S2:** Structure analysis of the total 6 compounds

Compound **1** (5-O-caffeoylshikimic acid): Pale brown powder (MeOH). ESI - MS  $m/z$ : 335.1 [M-H]<sup>-</sup>; Molecular formula is C<sub>16</sub>H<sub>16</sub>O<sub>8</sub>. <sup>1</sup>H NMR (500 MHz, CD<sub>3</sub>OD)  $\delta$ : 7.52 (1H, d,  $J$  = 16.4 Hz, H-9), 7.05 (1H, d,  $J$  = 2.3 Hz, H-2'), 6.98 (1H, dd,  $J$  = 8.5, 2.4 Hz, H-6'), 6.79 (1H, d,  $J$  = 8.6 Hz, H-5'), 6.72 (1H, m, H-2), 6.20 (1H, d,  $J$  = 16.2 Hz, H-8), 5.28 (1H, m, H-5), 4.43 (1H, m, H-3), 4.14 (1H, m, H-4), 2.89 (2H, m, H-6).

**Compound 2** (*engeletin*): White crystalline powder (MeOH). ESI-MS  $m/z$ : 433.1  $[M-H]^-$ ; Molecular formula is  $C_{21}H_{22}O_{10}$ .  $^1H$  NMR (500 MHz,  $CD_3OD$ )  $\delta$ (ppm): 7.24 (2H, d,  $J = 8.8$  Hz, H-2',6'), 6.79 (2H, d,  $J = 8.8$  Hz, H-3',5'), 5.94 (1H, s, H-8), 5.89 (1H, s, H-6), 5.30 (1H, d,  $J = 9.6$  Hz, H-2), 4.68 (1H, d,  $J = 3.8$  Hz, H-3), 3.86 (1H, d,  $J = 5.5$  Hz, H-1''), 3.72 (1H, dt,  $J = 10.4, 5.2$  Hz, H-3''), 3.65 (1H, dd,  $J = 13.5, 5.4$  Hz, H-2''), 1.24 (3H, d,  $J = 6.5$  Hz, H-6'').

**Compound 3** (*quercetin*): Yellow amorphous powder (MeOH). ESI-MS  $m/z$ : 301.0  $[M-H]^-$ ; Molecular formula is  $C_{15}H_{10}O_7$ .  $^1H$  NMR (500 MHz,  $CD_3OD$ )  $\delta$ : 9.47 (1H, s, 3-OH), 7.68 (1H, s, 3'-OH), 7.45 (1H, d,  $J = 2.1$  Hz, H-2'), 7.34 (1H, dd,  $J = 8.5, 2.1$  Hz, H-6'), 6.79 (1H, d,  $J = 8.8$  Hz, H-5'), 6.29 (1H, d,  $J = 2.0$  Hz, H-8), 6.20 (1H, d,  $J = 2.0$  Hz, H-6).

**Compound 4** (*shikimic acid ethyl ester*): Yellow oily liquid. ESI-MS  $m/z$ : 201.1  $[M-H]^-$ ; Molecular formula is  $C_9H_{14}O_5$ .  $^1H$  NMR (500 MHz,  $CD_3OD$ )  $\delta$ : 6.65 (1H, d,  $J = 7.6$  Hz, H-2), 4.54 (1H, d,  $J = 6.4$  Hz, 3-OH), 4.46 (1H, m, H-3), 4.22 (2H, q,  $J = 7.2$  Hz, H-8), 4.05 (1H, m, H-5), 3.83 (1H, d,  $J = 6.3$  Hz, 5-OH), 3.76 (1H, m, H-4), 3.58 (1H, d,  $J = 6.7$  Hz, 4-OH), 2.55 (2H, m, H-6), 1.24 (3H, d,  $J = 7.5$  Hz, H-9).

**Compound 5** (*taxifolin*): White amorphous powder (MeOH). ESI-MS  $m/z$ : 303.1  $[M-H]^-$ ; Molecular formula is  $C_{15}H_{12}O_7$ .  $^1H$  NMR (500 MHz,  $CD_3OD$ )  $\delta$ : 6.86 (1H, m, H-2'), 6.79 (1H, m, H-6'), 6.75 (1H, m, H-5'), 5.93 (1H, d,  $J = 2.0$  Hz, H-8), 5.89 (1H, d,  $J = 2.0$  Hz, H-6), 5.07 (1H, d,  $J = 7.3$  Hz, H-2), 4.67 (1H, m, H-3).

**Compound 6** (*astilbin*): White powder (MeOH). ESI-MS  $m/z$ : 449.3  $[M-H]^-$ ; Molecular formula is  $C_{21}H_{22}O_{11}$ .  $^1H$  NMR (500 MHz,  $CD_3OD$ )  $\delta$ : 6.84 (1H, s, H-2'), 6.74 (2H, m, H-5', 6'), 5.89 (2H, dd,  $J = 9.2, 1.9$  Hz, H-6, 8), 5.41 (1H, d,  $J = 8.5$  Hz, H-2), 4.98 (1H, d,  $J = 6.3$  Hz, H-3), 4.66 (1H, m, H-1''), 3.81 (1H, m, H-5''), 3.47 (1H, m, H-4''), 2.21 (1H, d,  $J = 6.5$  Hz, H-3''), 1.25 (1H, d,  $J = 6.5$  Hz, H-6'').
